# Supplementary material
Source: ML conference proceedings conference paper supplement (https://openaccess.thecvf.com/content/CVPR2022/html/Willis_JoinABLe_Learning_Bottom-Up_CVPR_2022_paper.html)
Supplement: Supplementary file 1 [file Willis_JoinABLe_Learning_Bottom-Up_CVPR_2022_supplemental.pdf]

## A. Supplementary Material

### A.1. Dataset

The *Fusion 360 Gallery* assembly dataset consists of two inter-related sets of data with assembly data and joint data. The data and supporting code are publicly available on GitHub<sup>2</sup> with a license allowing non-commercial research. We now outline related datasets, data processing steps, documentation, and statistics about the dataset.

#### A.1.1 Related Datasets

The ABC dataset [30] provides 1 million CAD assemblies in the B-Rep format, containing valuable analytic representations of surfaces and curves. However, each assembly contains individual part files positioned in global space without the critical joint information describing how parts are connected and constrained together. Other datasets providing designs in B-Rep format only include part geometry and lack assembly data entirely [25, 31, 62, 63].

Recently a number of datasets have extended existing 3D shape datasets, such as ShapeNet [7] and PartNet [47], with additional human annotated labels for part mobility [21, 58, 65, 68]. The resulting synthetic assemblies have joint type and range of motion information included. Our dataset differs from these datasets in several ways:

1. We provide CAD assemblies that are more representative of real world design, including detailed design such as fasteners.
2. Joint connectivity and component hierarchy are defined by the designers themselves rather than human annotators.
3. Joints between parts are defined by discrete designer-selected entities, such as B-Rep faces and edges, making them well suited to learning tasks.
4. We provide B-Rep and mesh representations together with extensive metadata.

We believe it is critical to leverage and learn from the rich sources of information available inside of existing CAD models. Rather than rely on extensive human annotation, our dataset exploits the knowledge of domain experts on how shapes are defined and assembled using industrial CAD modeling software.

Concurrent to our work, AutoMate [27] announced a similar dataset to ours with a larger number of overall designs. Based on the description of the dataset in [27], we note several advantages that may be helpful for users of our dataset:

1. We preserve the sub-assembly hierarchy for all assemblies, allowing for the creation of multiple hierarchi-

cal representations via contacts, joints, or the designer-defined assembly tree.

2. We provide assembly metadata listing the contact surfaces, hole types, materials, and various user specified tags for each design.
3. We consolidate joints across the dataset, meaning that for two given parts in our joint data we list all known ground truth joints between them. This avoids presenting the network with contradictory labels during training, where multiple different versions of a positively labelled joint configuration could exist across data samples.
4. We provide a ‘clean’ test and validation set for joint prediction by removing potential positive unlabeled samples.

Ultimately we believe both datasets will be helpful to cross-validate using designs created in different CAD software and increase the robustness of learning-based methods. Future updates to the AutoMate dataset may include a number of the capabilities listed above.

#### A.1.2 Data Processing

We create the *Fusion 360 Gallery* assembly dataset from approximately 20,000 designs in the native Fusion 360 .f3d CAD file format. We use the Fusion 360 Python API<sup>3</sup> to parse the native .f3d files into JSON format text files containing the main CAD parameter information, and geometry files in both B-Rep and mesh format. We use separate pipelines to process the assembly and joint data. After the data has been extracted we rebuild each design and compare it with the original to ensure data validity. Failure cases and any duplicate designs, are not included in the dataset. For the assembly data, we consider a design a duplicate when there is an exact match in all of the following: body count, occurrence count, component count, joint count, contacts count, hole count, surface area to one decimal point, and volume to one decimal point. This process allows us to remove duplicate designs from the dataset that have been uploaded multiple times. Using this process we identify and remove approximately 840 designs from the assembly data. For the joint data, we handle duplicates using the process of joint consolidation described in Section A.1.4.

#### A.1.3 Assembly Data

In mechanical CAD software, *assemblies* are collections of *parts*, represented as 3D shapes, that together represent an overall design, or object. In our assembly data we filter out designs that contain only a single part, leaving us with 8,251 assemblies containing a total of 154,468 separate parts. A

<sup>2</sup><https://github.com/AutodeskAILab/Fusion360GalleryDataset>

<sup>3</sup><https://help.autodesk.com/view/fusion360/ENU/>

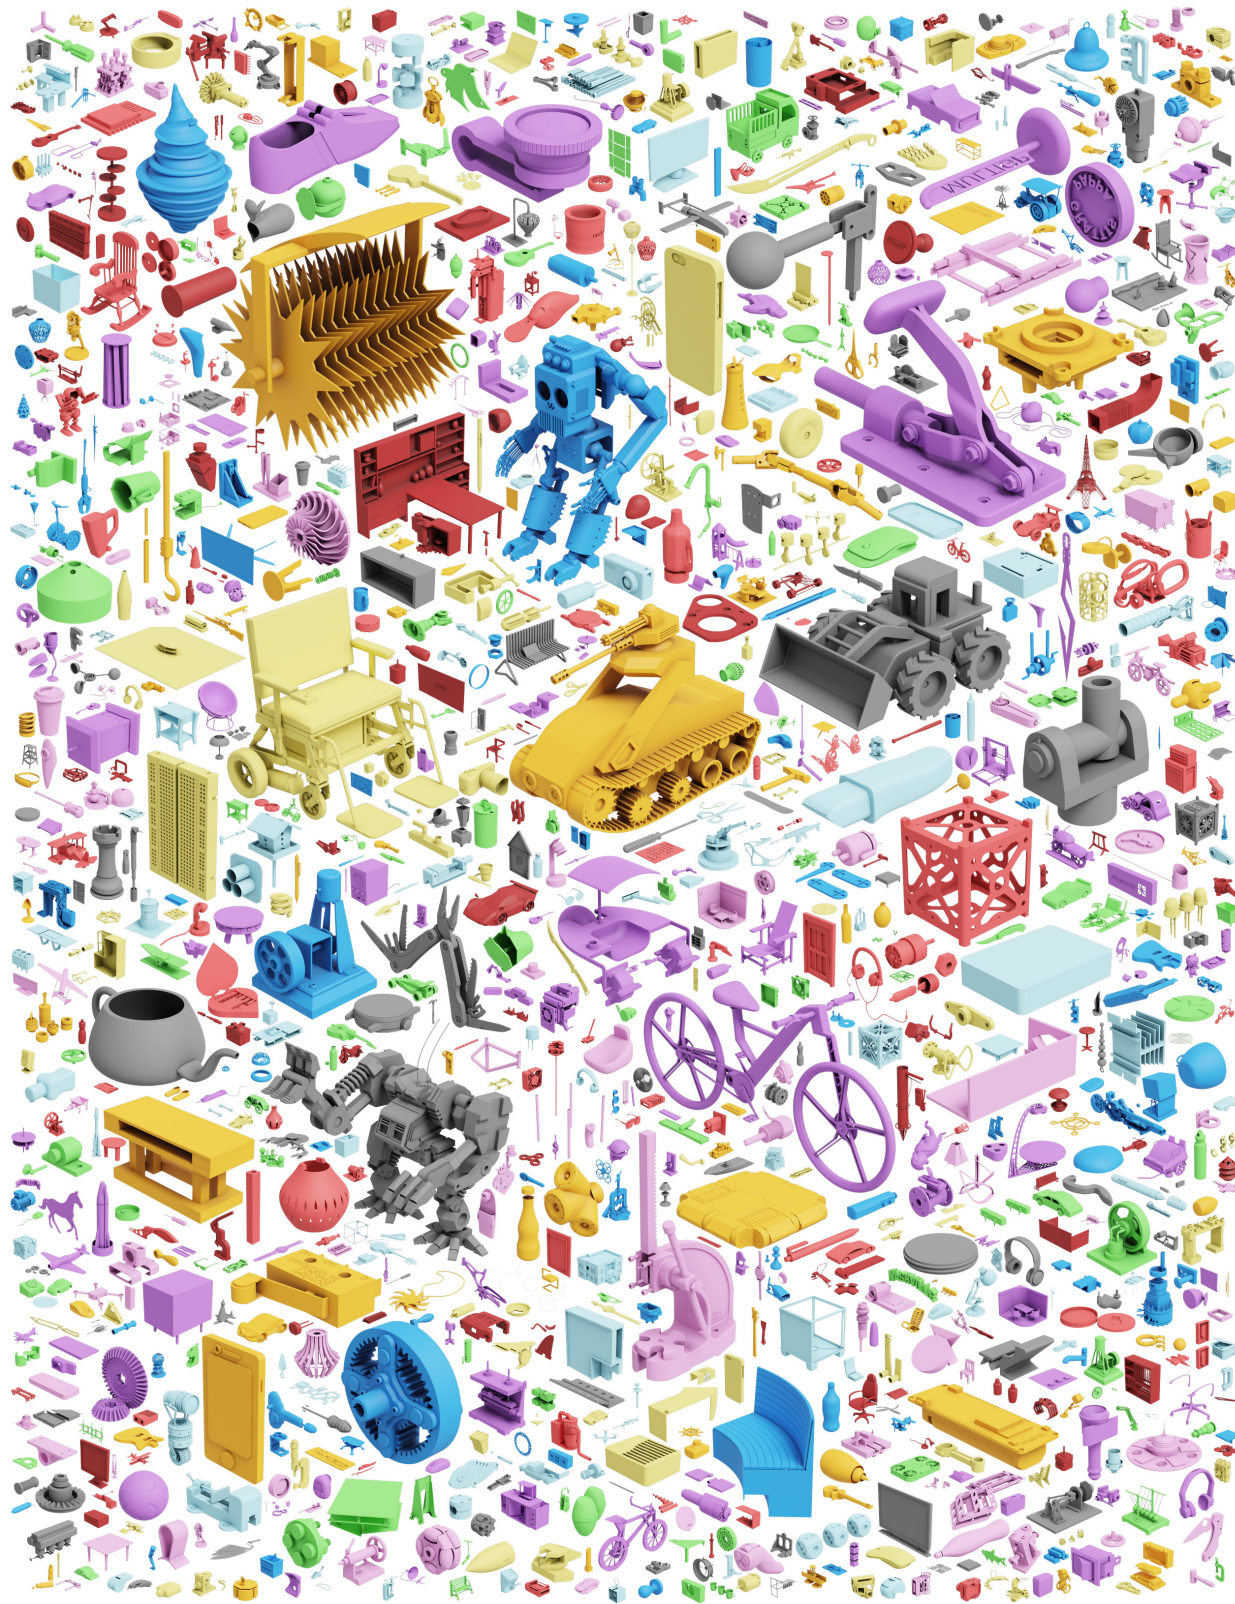

Figure 7. An overview of assemblies in the *Fusion 360 Gallery* assembly dataset.

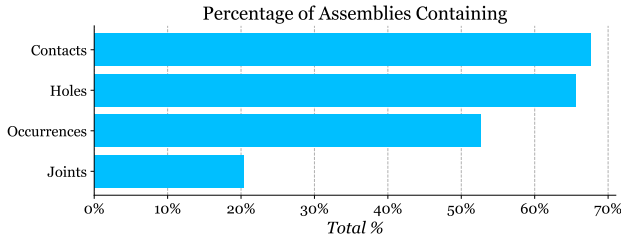

Figure 8. The percentage of assemblies containing contacts, holes, occurrences (instances of components), and joints.

random sampling of these assemblies is shown in Figure 7. Individual parts can be grouped together into *components* that represent reusable parts of a design, for example a single screw or a sub-assembly containing multiple components. Components can be positioned in global coordinates or constrained to one another using *joints*. *Contacts* exist when faces of parts in the assembly touch, within a tolerance, with the faces of other parts. Our assembly data is provided in a JSON text format containing the top-level data elements listed in Table 3. The structure and representation of the data follows the Fusion 360 API. We use universally unique identifiers (UUID) to cross reference elements with the JSON data. In the following paragraphs we describe the top-level elements in the data with more detail. Figure 8 lists the percentage of assemblies containing several of the top-level data elements described in Table 3.

**Root** The root of the assembly refers to the root node from which the hierarchical assembly graph can be constructed, as shown in Figure 9, right. The root links to the component UUID that the designer specified to be at the top of the tree, and it also links to any bodies that might be contained by the root.

**Components** Components are the building blocks that make up assemblies. Each component contains one or more bodies, a name, a part number and is assigned a UUID. Further information on components can be found in the Fusion 360 API documentation for the [Component](#) class.

**Bodies** Bodies are the geometric elements, represented as B-Reps, that make up components. The geometric data of each body is included in the dataset as described in Section A.1.3. Each body is assigned a UUID, and contains a name, physical properties, appearance, material, as well as the file names of the corresponding B-Rep, mesh, and image files. The physical properties of the body include the center of mass, area, volume, density, and mass. The appearance of the body refers to the material used for visual appearance, such as rendering, and contains the UUID and name of the user-assigned appearance. The material of the

| Element            | Description                                                                                                                       |
|--------------------|-----------------------------------------------------------------------------------------------------------------------------------|
| <b>Root</b>        | The root component of the design as defined by the designer.                                                                      |
| <b>Components</b>  | Components containing bodies or other components to form sub-assemblies.                                                          |
| <b>Bodies</b>      | The underlying 3D shape geometry in the B-Rep format.                                                                             |
| <b>Occurrences</b> | Instances of components, referencing the parent component with instance properties such as location, orientation, and visibility. |
| <b>Tree</b>        | The designer-defined hierarchy of occurrences in the design. Often used to organize sub-assemblies into a meaningful hierarchy.   |
| <b>Joints</b>      | Constraints defining the relative pose and degrees of freedom (DOF) between a pair of occurrences.                                |
| <b>Contacts</b>    | Faces that are in contact between different bodies.                                                                               |
| <b>Properties</b>  | Statistical information and metadata about the overall assembly.                                                                  |
| <b>Holes</b>       | A list of hole features with information about the type of hole, size, direction, and location.                                   |

Table 3. Descriptions of the top-level elements provided in our assembly data.

body, on the other hand, refers to the physical material from which the physical properties of the body are derived, such as the weight and density, and contains the UUID and name of the material. Figure 10 shows the number of bodies in an assembly as a distribution across the dataset. Further information on bodies can be found in the Fusion 360 API documentation for the [BRepBody](#) class.

**Occurrences** Occurrences are instances of components that can have independent parameters applied, such as visibility, location, and orientation, while maintaining the same geometry as their parent component. An occurrence is to component, as Object is to Class in object oriented programming. Occurrences are given a UUID and link to a parent component. The flag `is_grounded` indicates whether the user locked the position of the occurrence, preventing further movements from happening via mouse-dragging in the Fusion 360 UI. The flag `is_visible` indicates whether the occurrence was displayed or not in the UI. Each occurrence also has information about the physical properties (aggregating the center of mass, area, volume, density, and mass of all included components and bodies), as well as the transformation matrix necessary to orient the occurrence

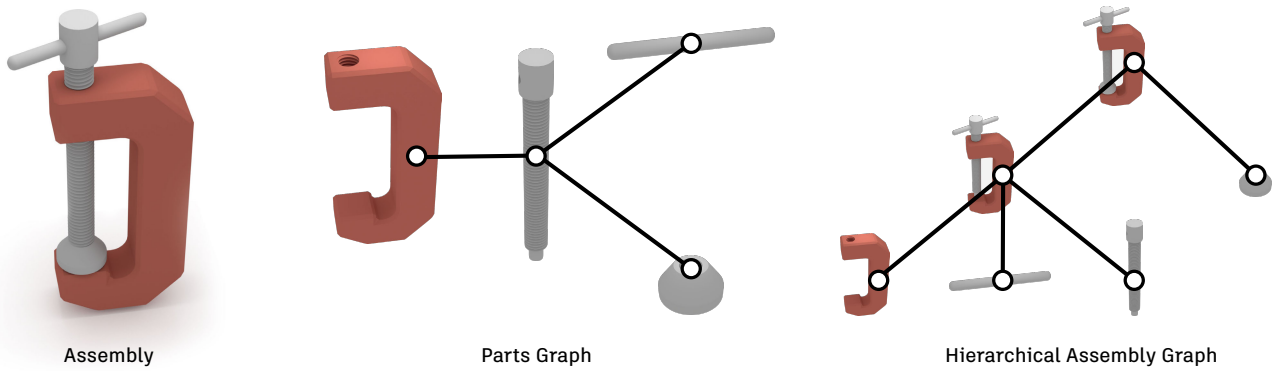

Figure 9. An example assembly (left) represented as a parts graph (middle) built from contact information, and as a hierarchical assembly graph (right) built from the designer-defined assembly tree.

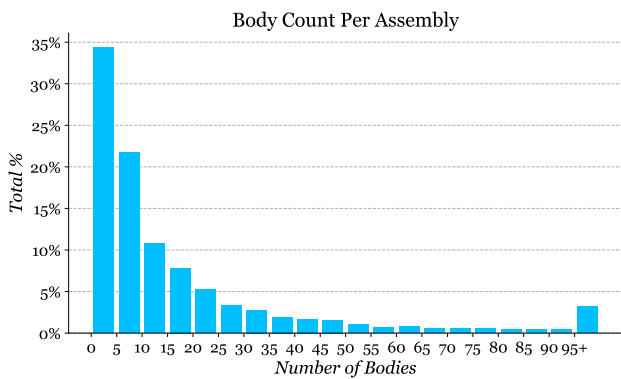

Figure 10. The number of bodies (separate 3D shapes) in an assembly, shown as a distribution across the assembly data.

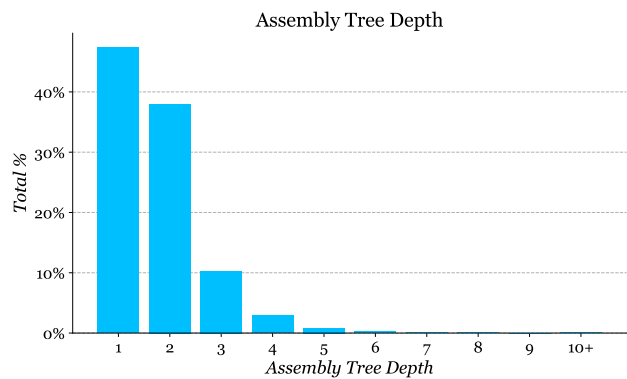

Figure 12. Assembly tree depth shown as a distribution across the assembly data.

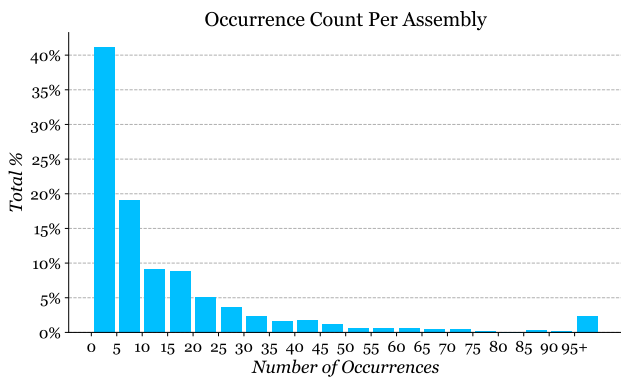

Figure 11. The number of occurrences (instances of a component) in an assembly, shown as a distribution across the assembly data excluding assemblies without occurrences.

within the global space. Figure 11 shows the number of occurrences in an assembly as a distribution across the dataset. Further information on occurrences can be found in the Fusion 360 API documentation for the [Occurrence](#) class.

**Tree** The dataset contains information about the hierarchy of occurrences defined by the designer, as shown in Figure 9 (right). The tree contains this hierarchy information by linking to occurrence UUIDs. Figure 12 shows the distribution of assembly tree depth, as defined by how many occurrences of components are nested in hierarchical layers below the root level.

**Joints** In CAD, joints specify movement between parts by constraining the degrees of freedom (DOF) of one part with respect to another. Specifically, joints are defined between occurrences. Joints are given a UUID, and contain the following information: name, type, parent component, occurrence one (the first occurrence that is part of the joint), occurrence two (the second occurrence being mated to the first), geometry or origin one (containing information about the designer-selected B-Rep entity and joint axis on body one), geometry or origin two (containing information about the designer-selected B-Rep entity and joint axis on body two), timeline index (indicating the order in which the joint was added relative to other joints or occurrences), offset

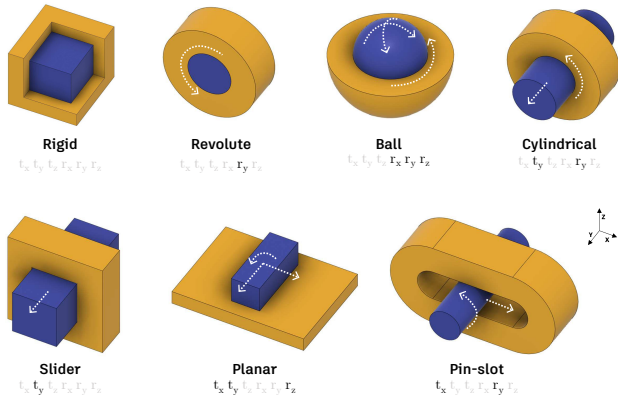

Figure 13. An overview of the joint types in the *Fusion 360 Gallery* assembly dataset and their degrees of freedom (DOF).

(distance separating geometry one from geometry two), angle (angle between geometry one and geometry two), and the flag `is_flipped` (indicating the positive or negative direction of the joint). As shown in Figure 13, Fusion 360 has seven different types of joints, each with associated joint motion information defining the DOF, motion limits, and rest state. We list below the different types of joints and the associated Fusion 360 API class.

- RigidJointType: `RigidJointMotion`
- RevoluteJointType: `RevoluteJointMotion`
- SliderJointType: `SliderJointMotion`
- CylindricalJointType: `CylindricalJointMotion`
- PinSlotJointType: `PinSlotJointMotion`
- PlanarJointType: `PlanarJointMotion`
- BallJointType: `BallJointMotion`

Figure 14 shows the number of joints in an assembly as a distribution across the dataset, excluding assemblies without joints. Further information on joints can be found in the Fusion 360 API documentation for the `Joint` and `AsBuiltJoint` classes.

**Contacts** Contacts are present when two bodies share coincident faces or are within a tolerance of 0.1 mm. An example of a contact is shown in Figure 15. Each contact present in the assembly is defined in the JSON with a pair of entities, indicating which faces are in contact. Each entity includes information about the body it belongs to, the occurrence it belongs to, the type of surface in contact (cylindrical, planar, etc.), the bounding box surrounding the entity, and an index that can be used to uniquely identify the face. Figure 16 shows the number of contacts in an assembly as a distribution across the dataset.

**Properties** We provide assembly-level metadata about the design under the properties element in the JSON. Ta-

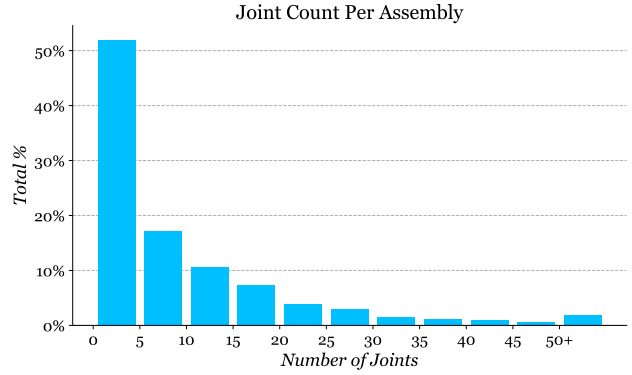

Figure 14. The number of joints in an assembly, shown as a distribution across the assembly data excluding assemblies without joints.

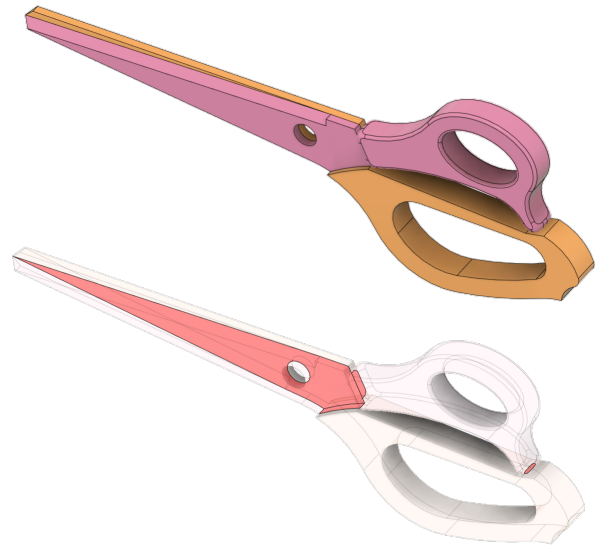

Figure 15. Two bodies (top) and their respective contacts highlighted in red (bottom).

ble 4 provides a summary of this metadata, including geometric information about the whole assembly, physical properties of the geometry, online statistics derived from the public web page hosted on the Autodesk Online Gallery [3] at the time the data was downloaded, and some user-selected categorical tags that provide more information about the context of the assembly.

**Holes** In CAD models, holes are common design features that often serve a specific purpose. Parts are commonly held together with bolts and screws, which either pass through or end in holes in the parts. As holes are an important design feature, we use an industrial CAD feature recognition tool to identify holes in each assembly for inclusion in the JSON data. Each hole lists information about the body it is in, di-

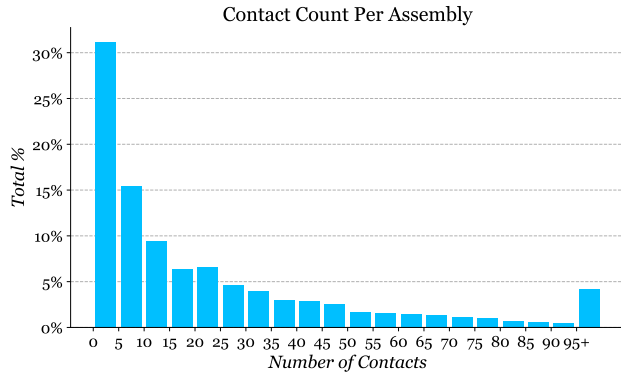

Figure 16. The number of contacts (B-Rep faces that are in contact with another body) in an assembly, shown as a distribution across the assembly data excluding assemblies without any contacts.

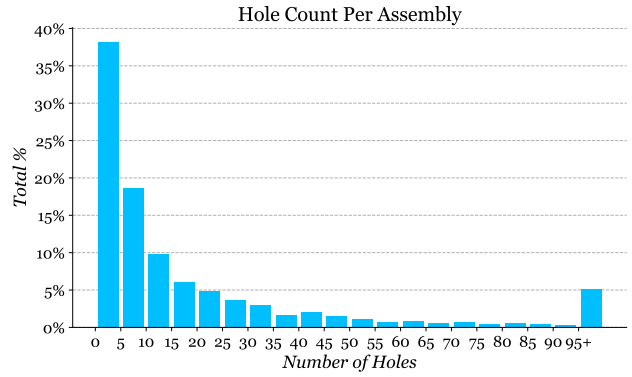

Figure 17. The number of holes in an assembly, shown as a distribution across the assembly data excluding assemblies without any holes.

| Category         | Property                                                                                                                                                     |
|------------------|--------------------------------------------------------------------------------------------------------------------------------------------------------------|
| <b>Geometric</b> | Vertex count                                                                                                                                                 |
|                  | Edge count                                                                                                                                                   |
|                  | Face count                                                                                                                                                   |
|                  | Loop count                                                                                                                                                   |
|                  | Shell count                                                                                                                                                  |
|                  | Body count                                                                                                                                                   |
|                  | Surface type count (plane, torus, cylinder, NURBS, cone, sphere, etc.)                                                                                       |
|                  | Vertex valence instance count                                                                                                                                |
| <b>Physical</b>  | Bounding box                                                                                                                                                 |
|                  | Area                                                                                                                                                         |
|                  | Volume                                                                                                                                                       |
|                  | Density                                                                                                                                                      |
|                  | Mass                                                                                                                                                         |
|                  | Center of mass                                                                                                                                               |
|                  | Principal axes                                                                                                                                               |
|                  | Moments of inertia                                                                                                                                           |
| <b>Online</b>    | Likes count                                                                                                                                                  |
|                  | Comments count                                                                                                                                               |
|                  | Views count                                                                                                                                                  |
| <b>Tags</b>      | Products used tag                                                                                                                                            |
|                  | Category tag (automotive, art, electronics, engineering, game, machine design, interior design, medical, product design, robotics, sport, tools, toys, etc.) |
|                  | Industry tag (architecture, engineering & construction; civil infrastructure; media & entertainment; product design & manufacturing; other industries).      |

Table 4. Each assembly includes the metadata listed in this table.

iameter, length, direction, and faces and edges that belong to the hole. Holes are also labeled with a hole type denoting the shape at the hole entrance, e.g. counterbore, counter-sunk, and at the end of the hole, e.g. through-hole, blind hole. Figure 17 shows the number of holes in an assembly

as a distribution across the dataset.

**Assembly Data Geometry Format** We provide geometry in several data formats, described below.

*Boundary Representation.* B-Rep data consists of faces, edges, loops, coedges and vertices [61]. A face is a connected region of the model’s surface. An edge defines the curve where two faces meet and a vertex defines the point where edges meet. Faces have an underlying parametric surface which is divided into visible and hidden regions by a series of boundary loops. A set of connected faces forms a body. B-Rep data is provided as .smt files representing the ground truth geometry and .step as an alternate neutral B-Rep file format. The .smt file format is the native format used by Autodesk Shape Manager, the CAD kernel within Fusion 360, and has the advantage of minimizing conversion errors.

*Mesh.* Mesh data is provided in .obj format representing a triangulated version of the B-Rep. Triangles belonging to each B-Rep faces are denoted in the .obj file as groups, for example, `g face 1`, indicates the next series of triangles in the file belong to the B-Rep face with index 1. B-Rep edges are converted to poly lines and added to the .obj file. The B-Rep edge and half-edge index is also denoted, for example, `g halfedge 7 edge 3`. Using these group indices it is possible to map directly from B-Rep faces and edges to mesh triangles and poly lines. Note that meshes provided in the dataset are not guaranteed to be manifold.

Other representations, such as point clouds or voxels, can be generated from the mesh or B-Rep data using existing data conversion routines and are not included in the dataset. For convenience we include a thumbnail .png image file together with each body and one for the overall assembly. Geometry files are named according to the UUID of the body in the assembly, with the overall assembly files given the name ‘assembly’ with the appropriate file extension.

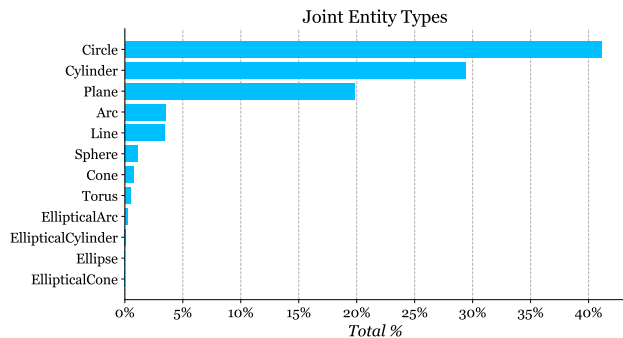

Figure 18. The distribution in the joint data of B-Rep entity types, from both surfaces and curves, selected by designers when creating a joint.

**Assembly Data Split** The assembly data is divided into a train-test split found in the file ‘train\_test.json’, and a train-test-cross split found in the file ‘train\_test\_cross.json’.

The main train-test split is created by randomly sampling 80% of the data into train, and 20% into test.

The train-test-cross split, on the other hand, is a cross dataset split with the joint data. For this split, data is chosen such that there is no overlap between the train assembly data and the test joint data, and no overlap between the test assembly data and the train joint data. This train-test-cross split allows for a model to be trained using train joint data and tested with test assembly data. It’s important to note that the train-test-cross split does not represent a normal distribution of the assembly data, and be may be biased. Nonetheless, the train-test-cross split is included to support applications leveraging both the assembly and joint data.

**Assembly Graph Representations** Using the contact, joint, or designer-defined assembly tree, various graph representations can be formed. For example, contact surface information and joint data can be used to construct a parts graph [12] where graph vertices represent parts and graph edges denote user-defined relative motion and constrained DOFs between part pairs (Figure 9, center). Similarly, the part hierarchy information found in the design tree can be used to form a hierarchical assembly graph [53] where the vertices of the graph are components and the graph edges denote parent-child relationships (Figure 9, right).

**Assembly Data Use Cases** We envision numerous use cases our dataset could enable. For example, project-level metadata such as the user-defined category and industry tags, could serve as a proxy for design requirements and support research around design synthesis from design requirements [71]. Similarly, project level meta-data about the popularity of the assemblies in the Autodesk Online Gallery (view counts, like counts, and comment counts)

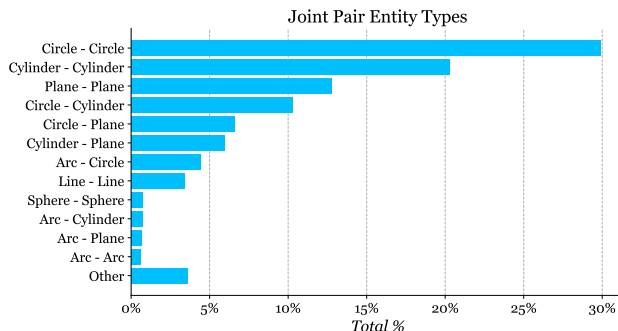

Figure 19. The distribution in the joint data of B-Rep entity types, shown as a pair, selected by designers when creating a joint between two bodies.

could support research around customer requirement analysis [44]. Per-body material metadata could support material prediction tasks [2]. This data could also support model-reuse workflows as well as global or part-level similarity retrieval tasks [42].

**Assembly Data Limitations** Due to the complexity of some large assemblies, we encounter data processing failures that force us to exclude some assemblies and elements of assemblies. In cases where the exported assembly cannot be rebuilt to match the original assembly, we are forced to discard the assembly but use the joints individually as described in Section A.1.4. When processing of contact or joint information fails, but the exported assembly matches the original, we retain the assembly and mark the contact or joint information as `null` to indicate a processing error. We find that processing failures occur for contacts with 13% of assemblies and for joints with 2%. A general limitation of the assembly data is that only 20% of designs have joints defined. We attribute this to the extra work required to manually define joints, which *JoinABLE* seeks to address by offering improved automation of joint setup.

#### A.1.4 Joint Data

Our joint data consists of pairs of parts with multiple joints defined between them, as described in Section 4 and illustrated in Figure 4. We provide the joint data separate from the assembly data as an accessible standalone dataset for the joint prediction task and to increase data quantity by including valid joints that were excluded from the assembly data due to unrelated data processing issues. Our joint data consists of 19,156 joint sets, containing 32,148 joints between 23,029 different parts. We provide an approximate 70/10/10/10% data split, for the train, validation, test, and original distribution test sets respectively.

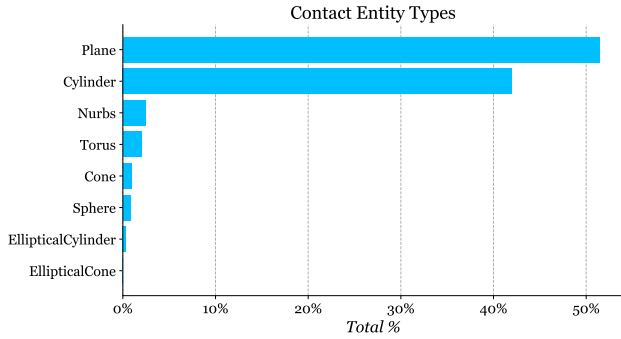

Figure 20. The distribution of B-Rep surface types for all contacts in the joint data.

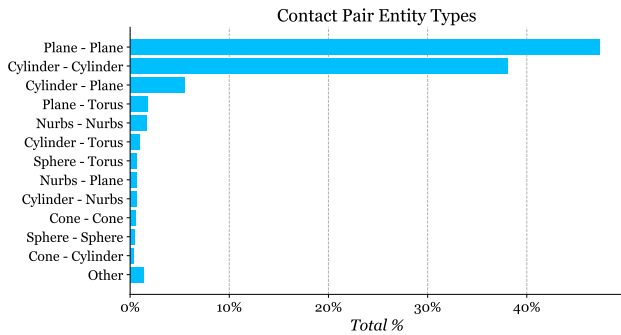

Figure 21. The distribution of B-Rep surface type pairs, in contact with one another in the joint data.

**Joint Data Labels** The designer-selected B-Rep faces and edges form the ground truth labels and are stored as indices that map to B-Rep entities, or alternatively triangle and poly line groups in the mesh representation we provide. Figure 18 shows the overall distribution of entity types (from both surfaces and curves) that are selected by designers to create joints. Circle and cylinder types are most prevalent due to their use with fasteners. Figure 19 further shows the relationship between pairs of joint entities by their entity type.

We also provide contact labels that indicate which B-Rep faces are coincident or within a tolerance of 0.1mm, when a joint is in an assembled state. Figure 20 shows the overall distribution of surface entity types that are in found to be in contact. Figure 21 further shows the relationship between pairs of surfaces that are found to be in contact. Finally we provide hole labels as found in the assembly data.

**Joint Data Geometry Format** We provide geometry in the same B-Rep and mesh data formats as the assembly data. In addition we provide a graph representation of the B-Rep topology and features used in our experiments. Here each graph vertex represents a B-Rep face or edge, with the graph edges defined by adjacency. We include the input

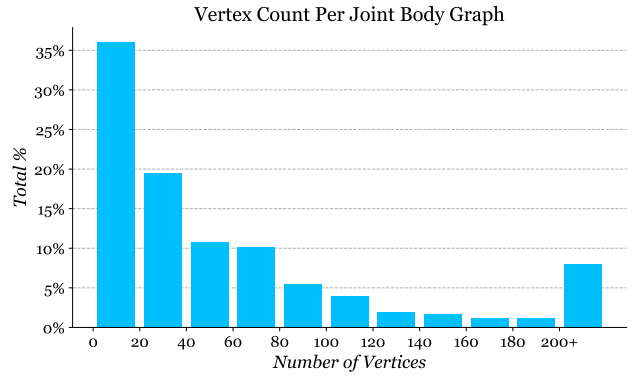

Figure 22. The number of vertices in each graph created from the faces and edges in a B-Rep body forming a joint. Shown as a distribution to indicate the complexity of designs in the joint data.

features described in Section A.2.3 as well as the UV-grid features (points, normals, trimming mask, tangents) used by the B-Grid baseline method. We extract the input features using the Fusion 360 API. We store the graph data as a JSON file in the NetworkX<sup>4</sup> node-link data format for easy integration with common graph neural network frameworks. Figure 22 shows the distribution of graph vertices in our graph representation of each part. This provides an approximate indication of the complexity of designs in the joint data.

**Joint Consolidation** We now provide additional details about the process of joint consolidation described in Section 3.4. We perform joint consolidation across all joints in the dataset. We begin by creating a unique hash for each pair of parts based on the B-Rep topology and geometric properties. For each B-Rep face and edge in a part we add the volume, moments of inertia, surface type, curve type, area, and length to the hash. Floating point values are truncated to 3 decimal place for moments of inertia and 1 decimal place for all other values. For surface and curve type we use the string values directly. This approach ensures matches between parts have identical topology, a key requirement to ensure the ground truth entities are mapped correctly. We then concatenate the hash for each pair of parts and group all joints with the same combined hash together to form joint sets. Figure 23 shows the number of joints in each joint set after joint consolidation has been performed. Roughly 70% of joint sets have a single joint, while the remaining 30% have more than one joint.

**Joint Data Limitations** To better scope the joint data and joint prediction task, we exclude some advanced joint configurations. We include only joints where a user has se-

<sup>4</sup><https://networkx.org>



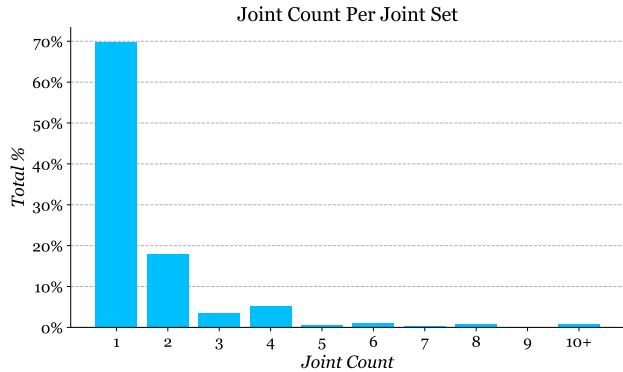

Figure 23. The distribution of joints in each joint set across the joint data.

lected a single B-Rep entity on each part. In Fusion 360 it is possible to select multiple entities, for example the user may select a plane face, then a corner of the plane to further refine the position of the joint axis. Although we exclude these samples from the joint data to narrow the scope of the joint prediction task, we include them in the assembly data where they represent 9% of all joints.

### A.1.5 Supporting Code

Together with the dataset we provide supporting code for working with the data in Python. To work with B-Rep data, we provide several Fusion 360 add-ins that can rebuild the assembly and joint data as a parametric CAD model from the JSON data provided in the dataset. The rebuilt CAD models have a component hierarchy and parametric joints fully defined. Fusion 360 is available free for students and educators. To work with the mesh data we provide example code to assembly and visualize the .obj files using common open source Python libraries. Finally we provide an assembly graph class to construct NetworkX graphs, such as those show in Figure 9, from the assembly data.

## A.2. Experiments

In this section we provide additional details of the experiments in Section 5 and report additional experiment results to examine which input features the network uses to make predictions, the effect of introducing label augmentation, and performance on a test set with potential positive unlabelled samples.

### A.2.1 Training

All experiments are run for 100 epochs with the final training weights used at test time. The reported values are the average over 5 runs with different random seeds and error bars indicate the standard deviation. All networks are implemented in PyTorch.

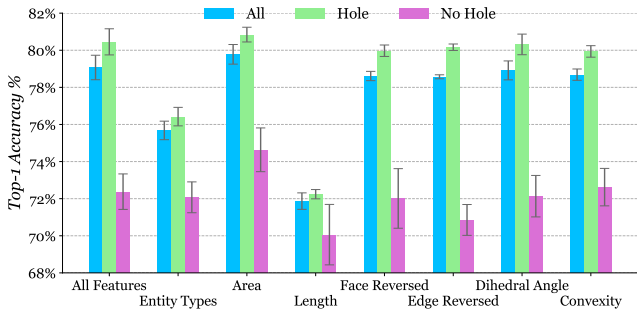

Figure 24. Effect on joint axis prediction top-1 accuracy by removing specific input features from the network. Results are shown for all data samples in the validation set (All), as well as the subset with holes (Hole) and without holes (No Hole).

Our method uses the PyTorch Geometric<sup>5</sup> implementation of GAT v2 [6] to perform message passing. Due to memory limitations, during training of our method we skip training samples where the graph representations of both parts have more than 950 graph vertices combined. All experiments with our method are trained with a per-GPU batch size of 2 across 4 NVIDIA V100 GPUs, dropout disabled, batch norm disabled, learning rate of 0.0001 with the Adam optimizer, and a learning rate scheduler that reduces on plateau.

### A.2.2 Evaluation

We evaluate on all data samples in the test and uniform distribution test set (described in Section A.2.6). To ensure large graphs can be evaluated without GPU memory limitations, we perform evaluation on the CPU.

As described in Section 5 we report results for data samples both with and without holes. We consider a data sample to have holes when a hole exists in either of the two parts from a joint set. We take this approach to ensure that for the more challenging ‘no hole’ case, the network is forced to make a prediction for parts without any form of hole, either connected with a joint or otherwise. In our test set we find that 83% of data samples have holes and 17% do not.

For quantitative results we evaluate the five trained models for each condition and report the mean result. We follow this procedure for the joint pose prediction task and perform search with the five different trained models. For qualitative results we pick the model with the highest quantitative result to use when generating figures. When multiple ground truth results exist, we show the closest ground truth result to those predicted.

<sup>5</sup>[https://github.com/pyg-team/pytorch\\_geometric](https://github.com/pyg-team/pytorch_geometric)

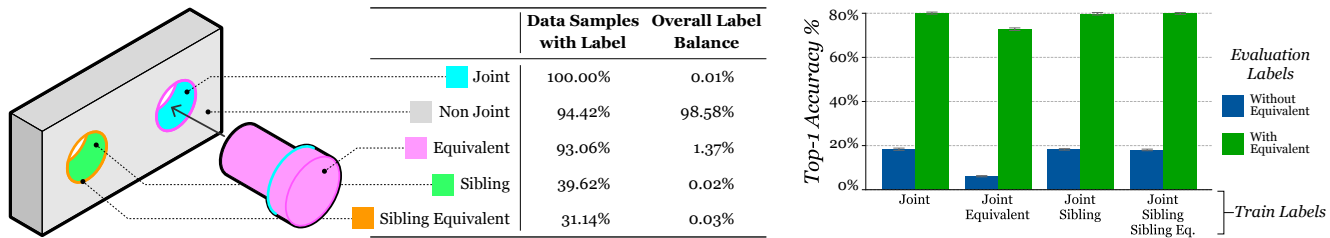

Figure 25. Label augmentation ablation study. *Left*: Types of label augmentation used, the percentage of training data samples with each label type, and the overall label balance. *Right*: Effect on joint axis prediction top-1 accuracy by training with different labels and evaluating with/without *Equivalent* labels.

### A.2.3 Input Feature Ablation Study

As described in Section 3.3, we use information about individual B-Rep faces and edges readily available in the B-Rep data structure for input features. In this experiment we perform an ablation study to identify which input features have the greatest impact on joint axis prediction performance. For B-Rep faces we evaluate a one-hot vector for the surface type (plane, cylinder, etc.), the area of the face, and a flag indicating if the surface is reversed with respect to the face. For B-Rep edges, we evaluate a one-hot vector for the curve type (line, circle, etc.), the length of the edge, a flag indicating if the curve is reversed with respect to the edge, the dihedral angle at the edge, and a one-hot vector for the edge convexity (convex, concave, etc.).

We train each model by sequentially removing input features and report the top-1 accuracy results on the validation set in Figure 24 for *All* samples and the *Hole* and *No Hole* subsets. We also include results using *All Features* for comparison purposes. We firstly observe that performance on the *Hole* samples is consistently higher than on the *No Hole* samples. We find that the *length* feature is the most critical for performance followed by *entity type*. This result aligns with the common use of cylinders at the interface between parts, with the network able to access both the B-Rep surface type and the length of neighboring B-Rep edges in the graph. As the length of the circular edge around the end of a bolt or lip of a hole is proportional to the hole radius, edge length can be effectively used as a way to identify bolts and holes of similar sizes. Conversely we find that the *area* feature does not act as a proxy in the same way and negatively affects performance. In our experiments in Section 5 of the main paper we remove the lowest performing features: *area*, *dihedral angle*, and *convexity*.

### A.2.4 Label Augmentation Study

Our training data has both an extreme label imbalance (99.9% negative) and positive unlabelled samples on the order of  $3\times$  the number of labelled samples. To counter these factors we explore the role of label augmentation with a study that adds three different types of augmented labels

to the ground truth labels. Figure 25, left, illustrates each type of label augmentation and provides statistics on how common these labels are in our training data. *Equivalent* labels, as described in Section 3.4, share the same joint axis as the ground truth *Joint* labels. *Sibling* labels are used on entities that are geometrically similar to the designer-selected *Joint* entities. These cover cases, such as the one illustrated on the left of Figure 25, where unlabeled holes exist in a part that have the same diameter as labeled ones. *Sibling Equivalent* labels are the equivalent entities that share the same joint axis. Finally, *Non-Joint* labels are the negative labels.

Figure 25, right, shows the effect of adding different training label augmentations with the joint axis prediction task. We show results for evaluation with and without *Equivalent* labels on the validation set. A large increase in accuracy is observed when *Equivalent* labels are used for evaluation, due to the overall increase in positive labels. As we consider a joint axis prediction to be correct if it is colinear with the ground truth joint axis in either direction, adding *Equivalent* labels during evaluation allows us to better judge network performance. We find that none of the label augmentation strategies increase performance, and in fact the addition of *Equivalent* labels at training time has a negative effect. We attribute this to the large increase in label quantity ( $137\times$ ) and diversity making the task of fitting a model more complex compared to the *Joint* labels alone. Despite the extreme data imbalance our method is able to perform when trained on only the joint entities defined in the original ground truth data.

### A.2.5 Human CAD Expert Baseline

We now provide further details of the human CAD expert study described in Section 5.1. We perform the study with 100 samples randomly selected from distributions with and without potential positive unlabeled samples containing *Sibling* entities. The same CAD expert is used for each set and asked to infer a joint configuration from two randomly rotated and translated parts based on what they believe is correct. No further guidance or details about the ground

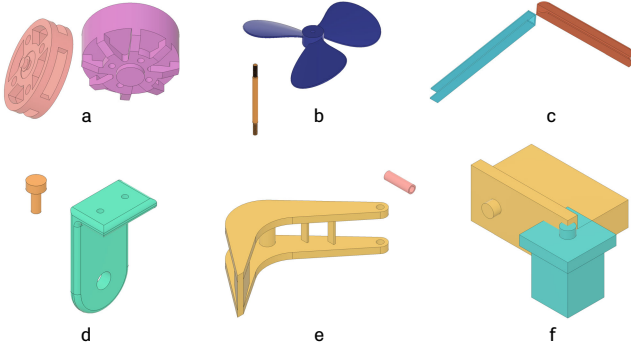

Figure 26. Example designs presented to a CAD expert during our human baseline study.

truth solution or the original assembly is provided. Example designs presented to the CAD expert are shown in Figure 26.

A limitation of the current study is an imbalance between *Hole* and *No Hole* data samples. From the 100 samples used in each study, random sampling produces 12 and 13 *No Hole* samples in each set, with the remainder *Hole* samples. To more accurately measure human performance in designs without holes, a larger sample size would be beneficial. Due to this limited sample size we do not report the break down for *Hole* and *No Hole* accuracy in Table 1 and 6, but detail it here for completeness. For the test set, 77/88 (82.95%) *Hole* and 7/12 (58.33%) *No Hole* data samples match the ground truth. For the uniform distribution test set, described in Section A.2.6, 66/87 (75.86%) *Hole* and 1/13 (7.69%) *No Hole* data samples match the ground truth. Although a limited sample size, the low performance on *No Hole* samples matches our general observation that joints are more difficult to infer when a definitive fastening mechanism is not apparent. This can be observed in Figure 26 where the *Hole* examples (a, b, d, e) generally have a more apparent solution than the *No Hole* examples (c, f).

### A.2.6 Joint Axis Prediction

We now provide further details of the joint axis prediction experiment described in Section 5.2.

**Joint Origin and Direction** We derive the joint axis based on the type of B-Rep entity predicted by the network. Table 5 lists the different B-Rep entity types and the source of the joint axis origin point and direction vector. For NURBS surfaces and curves, no standard way of deriving the joint origin and direction is used. As it is extremely rare to encounter joints defined using NURBS, we simply discard them when training with B-Rep based methods.

| B-Rep Entity Type           | Origin      | Direction      |
|-----------------------------|-------------|----------------|
| Plane Surface               | Centroid    | Normal         |
| Cylinder Surface            | Origin      | Axis           |
| Cone Surface                | Origin      | Axis           |
| Sphere Surface              | Origin      | Z              |
| Torus Surface               | Origin      | Axis           |
| Elliptical Cylinder Surface | Origin      | Axis           |
| Elliptical Cone Surface     | Origin      | Axis           |
| NURBS Surface               | -           | -              |
| Line Curve                  | Start Point | Line Direction |
| Arc Curve                   | Center      | Normal         |
| Circle Curve                | Center      | Normal         |
| Ellipse Curve               | Center      | Normal         |
| Elliptical Arc Curve        | Center      | Normal         |
| NURBS Curve                 | -           | -              |

Table 5. The joint origin and direction information used to define a joint axis, are derived from B-Rep entities as described above.

**Baseline Implementation** We now describe further implementation details for the baseline methods described in Section 5.2. For the point cloud baselines we use area-based sampling on a mesh of each part using the Trimesh library<sup>6</sup>. We create 1024 points, for a total of 2048 points combined. We normalize each part to the unit range of  $-1$  to  $1$  and center it at the origin. We use a common encoder architecture for the B-Dense and B-Discrete baselines, illustrated in Figure 27. Key here is adapting the architecture to our setting where *two parts* are used as input rather than one. We want to ensure that the embeddings contain features from both parts, so meaningful predictions can be made. The network takes as input two separate point clouds and creates both a shape embedding and a point-wise embedding from two separate PointNet++ [49] encoders, using the PyTorch implementation<sup>7</sup>. The shape embedding, representing the global shape of each part, is passed through a fully-connected layer then repeated and concatenated to the point-wise embedding of the opposing part. At this stage we have embeddings for each part containing combined shape and point-wise features. These embeddings are then passed through a shared 3-layer MLP encoder using ReLU activation and dropout.

Specific details of the decoder and loss functions are described below. Common to both point cloud baselines, and unique to our setting, is the need to calculate the loss over  $\geq 1$  ground truth joint axes. As any ground truth joint axis is considered correct, we calculate the loss from the single network prediction against each ground truth joint axis and take the minimum. During evaluation we follow the same approach and consider a joint axis prediction a ‘hit’ if it is collinear with *any* ground truth joint axis in either direction.

<sup>6</sup><https://trimsh.org>

<sup>7</sup>[https://github.com/yanx27/Pointnet\\_Pointnet2\\_pytorch](https://github.com/yanx27/Pointnet_Pointnet2_pytorch)

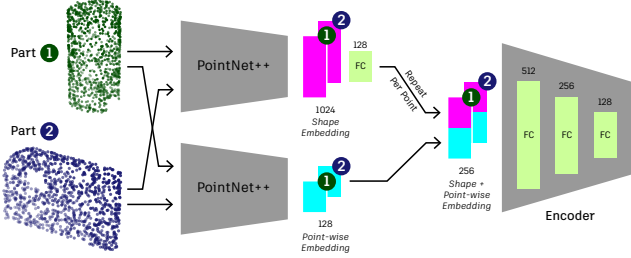

Figure 27. Encoder network architecture used for the B-Dense and B-Discrete baseline methods.

To evaluate collinearity we use a distance threshold of 0.1, equating to 5% of the unit range of  $-1$  to  $1$ , and an angular threshold of  $10^\circ$ , equating to approximately 5% of the  $180^\circ$  range, as we consider either axis direction to be correct.

**B-Dense Implementation** The B-Dense baseline follows Li et al. [37], which densely regresses association and joint parameters for each point in the point cloud. The association parameters is a per-point variable estimated by the network which predicts if a given point is near a given joint. The ground truth association is calculated for a point if the point is below a certain Euclidean distance threshold to the joint direction axis. We follow Li et al. [37] and use the cross entropy loss to compare the predicted association with the ground truth association for every point. The joint parameter is a 7D vector predicted by the network for each point, where the first 3 dimensions represent the joint direction unit vector and the last 4 dimensions the pivot point. We compare the predicted joint direction unit vector with the ground truth joint direction unit vector using mean squared error loss for only the points associated with that joint. The pivot point is calculated by predicting a projection unit vector and the distance from a given point to the joint axis. Similar to predicting the joint direction, for each associated point we regress the projection unit vector and the scalar distance with the ground truth parameters respectively. Note during test time, similar to Li et al. [37] a voting scheme is applied across the associated points to regress the pivot point and joint direction axis.

We train the B-Dense baseline with a per-GPU batch size of 7 across 8 NVIDIA V100 GPUs, dropout of 0.1, batch norm enabled, learning rate of 0.0003 with the Adam optimizer, and a learning rate scheduler that reduces on plateau. The threshold parameter for the ground truth association is set to 0.2.

**B-Discrete Implementation** The B-Discrete baseline follows Shape2Motion [58] and uses a hybrid of discrete classification and regression to predict the joint origin point and direction vector. For the joint origin point prediction, the network is trained to select points in the input point cloud

|             | All<br>Acc.% $\uparrow$ | Hole<br>Acc.% $\uparrow$ | No Hole<br>Acc.% $\uparrow$ | Param.<br># $\downarrow$ |
|-------------|-------------------------|--------------------------|-----------------------------|--------------------------|
| <b>Ours</b> | <b>62.22</b>            | <b>63.47</b>             | <b>56.91</b>                | 1.3M                     |
| B-Dense     | 6.00                    | 5.24                     | 10.00                       | 3.2M                     |
| B-Discrete  | 2.71                    | 2.86                     | 2.09                        | 4.0M                     |
| B-Grid      | 50.34                   | 51.19                    | 46.72                       | 3.1M                     |
| B-Heuristic | 57.99                   | 60.54                    | 47.11                       | -                        |
| B-Random    | 15.85                   | 16.08                    | 15.59                       | -                        |
| Human       | 69.00                   | -                        | -                           | -                        |

Table 6. Joint axis prediction accuracy results are shown for all data samples in the uniform distribution test set (All), the subset of data samples with holes (Hole) and without holes (No Hole). The number of network parameters is also shown (Param.). Finally, results from a human CAD expert on 100 test samples are shown.

closest to the ground-truth. For that, a binary indicator vector is used, and a cross-entropy is employed for optimization. In addition, a displacement vector is used to estimate the displacement between anchor points and ground-truth origin points. The displacement is optimized with an L2 loss. For the direction vector estimation, we discretize each dimension of the direction vector into 14 classes. The B-Discrete model estimates a class probability and a residual for each dimension to correct the error through discretization. The orientation loss comprises the cross-entropy loss for the classification and the L2 for the residual error. The overall loss is a summation of joint origin and orientation losses. When adapting this baseline, we refer to the authors’ original implementation<sup>8</sup>.

We train the B-Discrete baseline with a per-GPU batch size of 16 across 4 NVIDIA Quadro RTX 6000 GPUs, dropout of 0.1, batch norm enabled, learning rate of 0.0003 with the Adam optimizer, and a learning rate scheduler that reduces on plateau.

**B-Grid Implementation** The B-Grid baseline follows the grid sampling approach of UV-Net [25] and uses a CNN-based encoder<sup>9</sup> to generate vertex embeddings before message passing is performed. The remainder of the network is identical to our method, including the joint axis prediction branch and loss function. During training we randomly rotate the input parts by  $45^\circ$  increments about the  $x$ ,  $y$ , and  $z$  axes to improve generalization. Due to memory limitations, we skip training samples where the graph representations of both parts have more than 950 graph vertices combined. We train the B-Grid baseline with a per-GPU batch size of 2 across 4 NVIDIA V100 GPUs, dropout disabled, batch norm enabled, learning rate of 0.0001 with the Adam optimizer, and a learning rate scheduler that reduces on plateau.

<sup>8</sup><https://github.com/wangxiaogang866/Shape2Motion>

<sup>9</sup><https://github.com/AutodeskAILab/UV-Net>

**Other Point Cloud Approaches** In addition to the point cloud baselines reported in Table 1, we attempted several other approaches that failed to produce results. We find that direct regression of the joint origin point and direction vector, similar to RPM-Net [68], struggles to align with the ground truth axes until the loss approaches zero. We find that classification of the joint origin and direction, by predicting each over a quantized space, only slightly improves compared to a regression-based approach. We also attempted data augmentation using random rotation of each point cloud but found it reduces overall accuracy. We attribute this to the point cloud based networks achieving higher accuracy by over-fitting on a subset of the data.

**Evaluation on a Uniform Distribution** In addition to the ‘clean’ test set, we retain an additional test set that matches the original data distribution and contains potential positive unlabeled samples. Figure 26, left shows an example of a positive unlabeled data sample where two holes exist for the bolt to be inserted, but only one is labeled. Although the uniform distribution test set cannot be used to reliably judge accuracy on the joint axis prediction task, we include the results in Table 6 for completeness and to demonstrate the effect of positive unlabeled samples during evaluation. We note that the overall accuracy drops for all methods, but the relative position of each method stays the same. The results underline the importance of removing potential positive unlabeled data samples for accurate evaluation.

**Top-k Accuracy** In Figure 28 we show the top- $k$  accuracy results to supplement the top-1 results for joint axis prediction reported in Table 1. We plot the top- $k$  accuracy for all relevant methods. We observe that both learning-based and heuristic methods saturate at  $k \approx 50$ . We note that the B-Grid baseline outperforms B-Heuristic when  $k > 2$ . We attribute this to the UV-grid representation of the geometry as well as the local aggregation of features. B-Heuristic and Ours both have access to more precise input features, such as lengths, areas, and entity types, compared to B-Grid which uses discretely sampled UV-grids to represent the surface and curve shapes. Increasing the sampling rate of curves and surfaces by using finer UV-grids, beyond the  $10 \times 10$  sampling used in the original paper [25], may yield better performance at the cost of memory and compute. B-Heuristic makes predictions on a per-entity level rather than aggregating features from a neighborhood, like B-Grid and our method does, and is unable to take the local shape into account. By choosing the right features for this task and employing a message-passing network, our method outperforms both B-Grid and B-Heuristic in any top- $k$  setting.

**Qualitative Results** In Figure 29 and 30 we show qualitative results for the joint axis prediction task described in

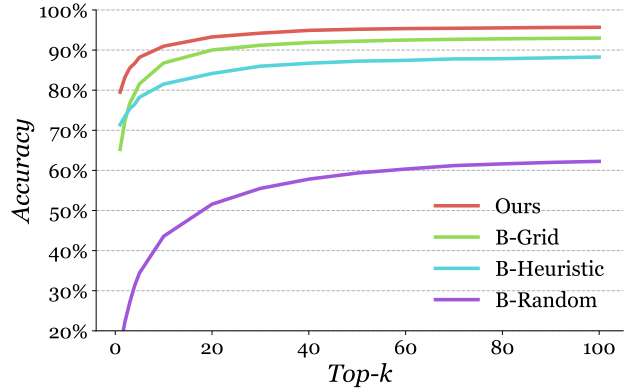

Figure 28. Joint axis prediction top- $k$  accuracy.

Section 5.2. We show each part used to form a joint individually in separate rows. Horizontal dividing lines are used to separate pairs of parts from different joint sets. The different predictions from each method are shown in columns. For all methods we visualize the joint axis with a yellow arrow. For the ground truth we show the designer-selected B-Rep entities in cyan, and the equivalent entities in pink. For B-Rep based predictions, we show the predicted B-Rep entities in cyan. We observe that by making predictions over the B-Rep entities directly the derived joint axis results naturally align to geometry. On the other hand, both point cloud methods, B-Dense and B-Discrete, suffer from noisy alignment with the geometry due to the use of regression.

### A.2.7 Joint Pose Prediction

We now provide further details of the joint pose prediction experiment described in Section 5.3.

**Joint Pose Search Implementation** Our joint pose search procedure takes as input the top- $k$  joint axis predictions from our network, together with a pair of parts, and outputs a selected joint axis prediction, offset, rotation, and flip parameter that can be used to assemble the parts. Our search procedure iterates over the top- $k$  joint axis predictions and applies the Nelder-Mead algorithm [48] to optimize the offset and rotation parameters based on the cost function described in Section 3.5.3. We optimize the continuous offset and rotation parameters with and without the discrete flip parameter enabled, for a total of  $k \times 2$  optimization runs for each data sample. We set the initial simplex parameters to zero offset and rotation. For parts that have rotational symmetry about the predicted joint axis, we optimize only for the offset parameter and set the rotation parameter to zero. Finally, we take the optimal set of parameters along with the corresponding joint axis prediction that minimizes the cost function. Using these predictions we recover the fi-

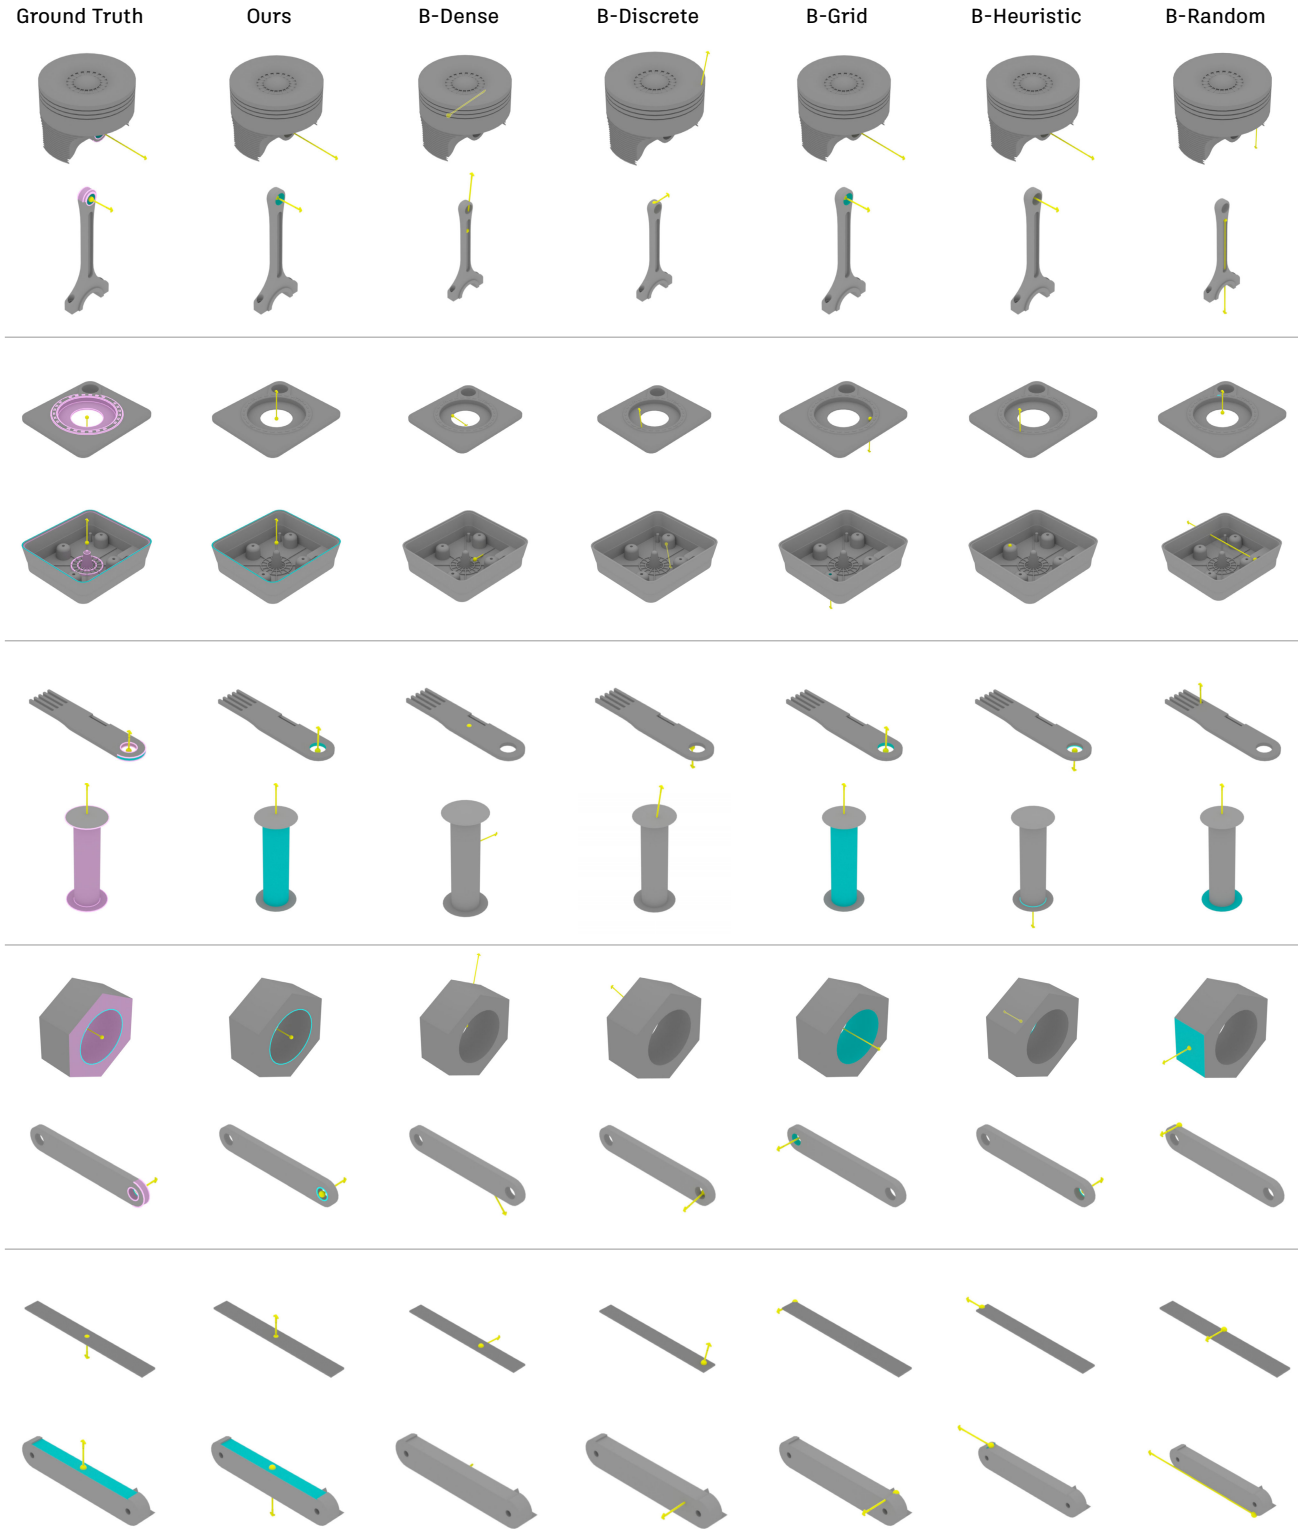

Figure 29. Qualitative results on the joint axis prediction task. Each of the two parts used to define a joint are shown individually in separate rows, with the different predictions from each method shown in columns. For all methods we visualize the joint axis with a yellow arrow. For the ground truth we show the designer-selected B-Rep entities in cyan, and the equivalent entities in pink. For B-Rep based predictions, we show the predicted B-Rep entities in cyan.

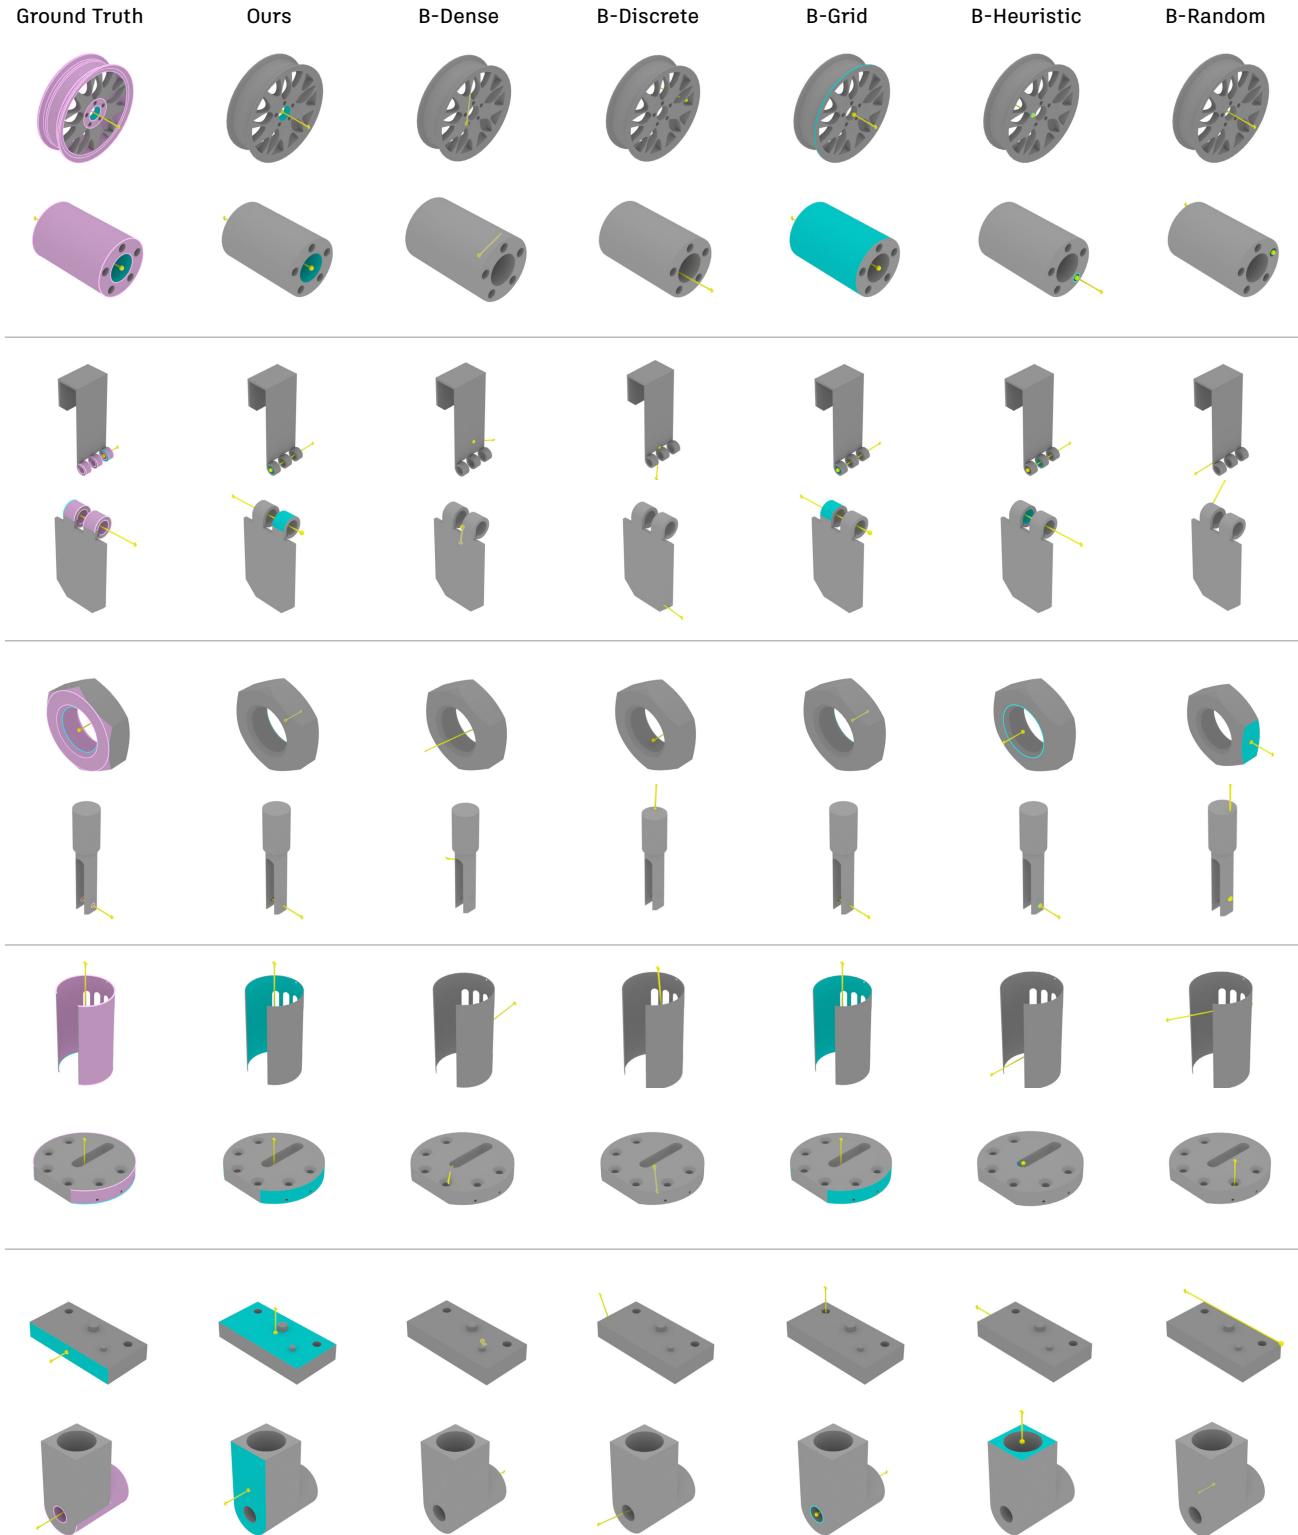

Figure 30. Qualitative results on the joint axis prediction task. Each of the two parts used to define a joint are shown individually in separate rows, with the different predictions from each method shown in columns. For all methods we visualize the joint axis with a yellow arrow. For the ground truth we show the designer-selected B-Rep entities in cyan, and the equivalent entities in pink. For B-Rep based predictions, we show the predicted B-Rep entities in cyan.

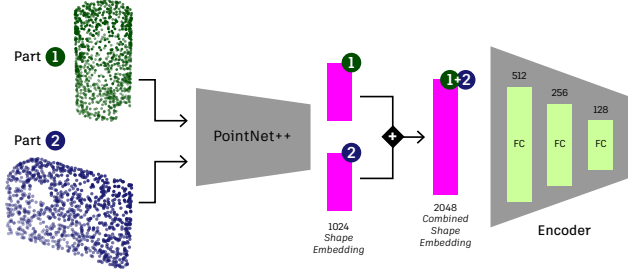

Figure 31. Encoder architecture for the B-Pose baseline method.

nal joint pose as a rigid body transform that aligns part one to part two. For each data sample, running search takes on average 2.58 seconds, excluding inference time, on a server with an Intel Xeon Platinum 3.41 GHz CPU.

To compute the overlap area  $A_{1\cap 2}$  in the cost function (Equation 5), we sample a dense set of points on the surface of part 1 and calculate the proportion  $p_A$  of points that are also on the surface of part 2 within a small tolerance. To perform this calculation we use a pre-computed signed distance field generated from part 2. Then,  $A_{1\cap 2}$  is computed as  $A_{1\cap 2} = p_A A_1$ . Similarly, we compute the overlap volume  $V_{1\cap 2}$  by sampling points inside the volume of part 1 and calculating the proportion  $p_V$  of points inside of part 2 (i.e. points that have a negative distance to part 2). As a result,  $V_{1\cap 2}$  is computed as  $V_{1\cap 2} = p_V V_1$ .

**B-Pose Implementation** The B-Pose baseline follows Huang et al. [23] to regress a translation point and rotation quaternion using a combination of L2 and CD loss terms. We adapt the related code from the authors PyTorch implementation<sup>10</sup> to our setting. We sample points with area-based sampling on a mesh of each part using the Trimesh library. We create 1024 points, for a total of 2048 points combined. We normalize each part to the unit range of  $-1$  to  $1$  and center it at the origin. We use a similar encoder architecture to that used with the joint axis prediction baselines, illustrated in Figure 31. Key here is adapting the architecture to our setting where we predict a single rigid body transform, in the form of a translation point and rotation quaternion, to assembly a pair of parts. We want to ensure that the embeddings contain features from both parts, so meaningful predictions can be made. The network takes as input two separate point clouds and creates a shape embedding for each with a PointNet++ [49] encoder, using the PyTorch implementation<sup>11</sup>. The shape embedding for both parts are concatenated together to form a combined embedding. This embedding is then passed through a 3-layer MLP encoder using ReLU activation and dropout.

<sup>10</sup><https://github.com/hyperplane-lab/Generative-3D-Part-Assembly>

<sup>11</sup>[https://github.com/yanx27/Pointnet\\_Pointnet2\\_pytorch](https://github.com/yanx27/Pointnet_Pointnet2_pytorch)

Regression of the translation point and rotation quaternion follows the original paper. We adapt the loss functions to calculate the loss over  $\geq 1$  ground truth pose configurations. As any ground truth pose is considered correct, we calculate the loss from the single network prediction against each ground truth joint pose and take the minimum. We train the B-Pose baseline with a per-GPU batch size of 8 across 4 NVIDIA V100 GPUs, dropout of 0.1, batch norm disabled, learning rate of 0.0003 with the Adam optimizer, and a learning rate scheduler that reduces on plateau.

**Evaluation** During evaluation we compare over multiple ground truth poses and take the joint pose prediction with the lowest CD. To ensure accurate evaluation results we re-sample all parts with 4096 points, apply the predicted transform to move the parts into an assembled state, and finally calculate CD.

**Qualitative Results** In Figure 32 we show additional qualitative results for the joint pose prediction task. The ground truth and each method is shown on its own row, with different assembled joints shown in columns.

### A.3. Future Work

In this section we discuss future applications and extensions of our method.

#### A.3.1 Future Applications

We now provide further details of the multi-part assembly demonstration described in Section 6. As input we use assembly data from our dataset and select samples from a test set that our network has not been trained on. Using the joint and contact information provided with the assembly data we form a parts graph that connects the parts together (Figure 33, top). Based on this graph we manually derive an assembly sequence of parts to be placed.

We begin the assembly process by presenting the first pair of parts (Figure 33, Step 1) to our pre-trained network and perform joint pose search using the network predictions. Our search procedure follows that described in Section 3.5.3. We next follow an iterative procedure where we assemble the first pair of parts to form the current state of the assembly and repeat joint pose search between the current assembly and the next part in the sequence that has yet to be placed (Figure 33, Step 2-3). We adapt the overlap volume and contact area in the cost function to be defined between the current state of the assembly and the part to be assembled. We repeat this procedure until all parts have been placed.

Our basic extension of joint pose search to the multi-part setting has several limitations that we show in Figure 34. Assemblies with a clear single axis, such as Figure 34a, are



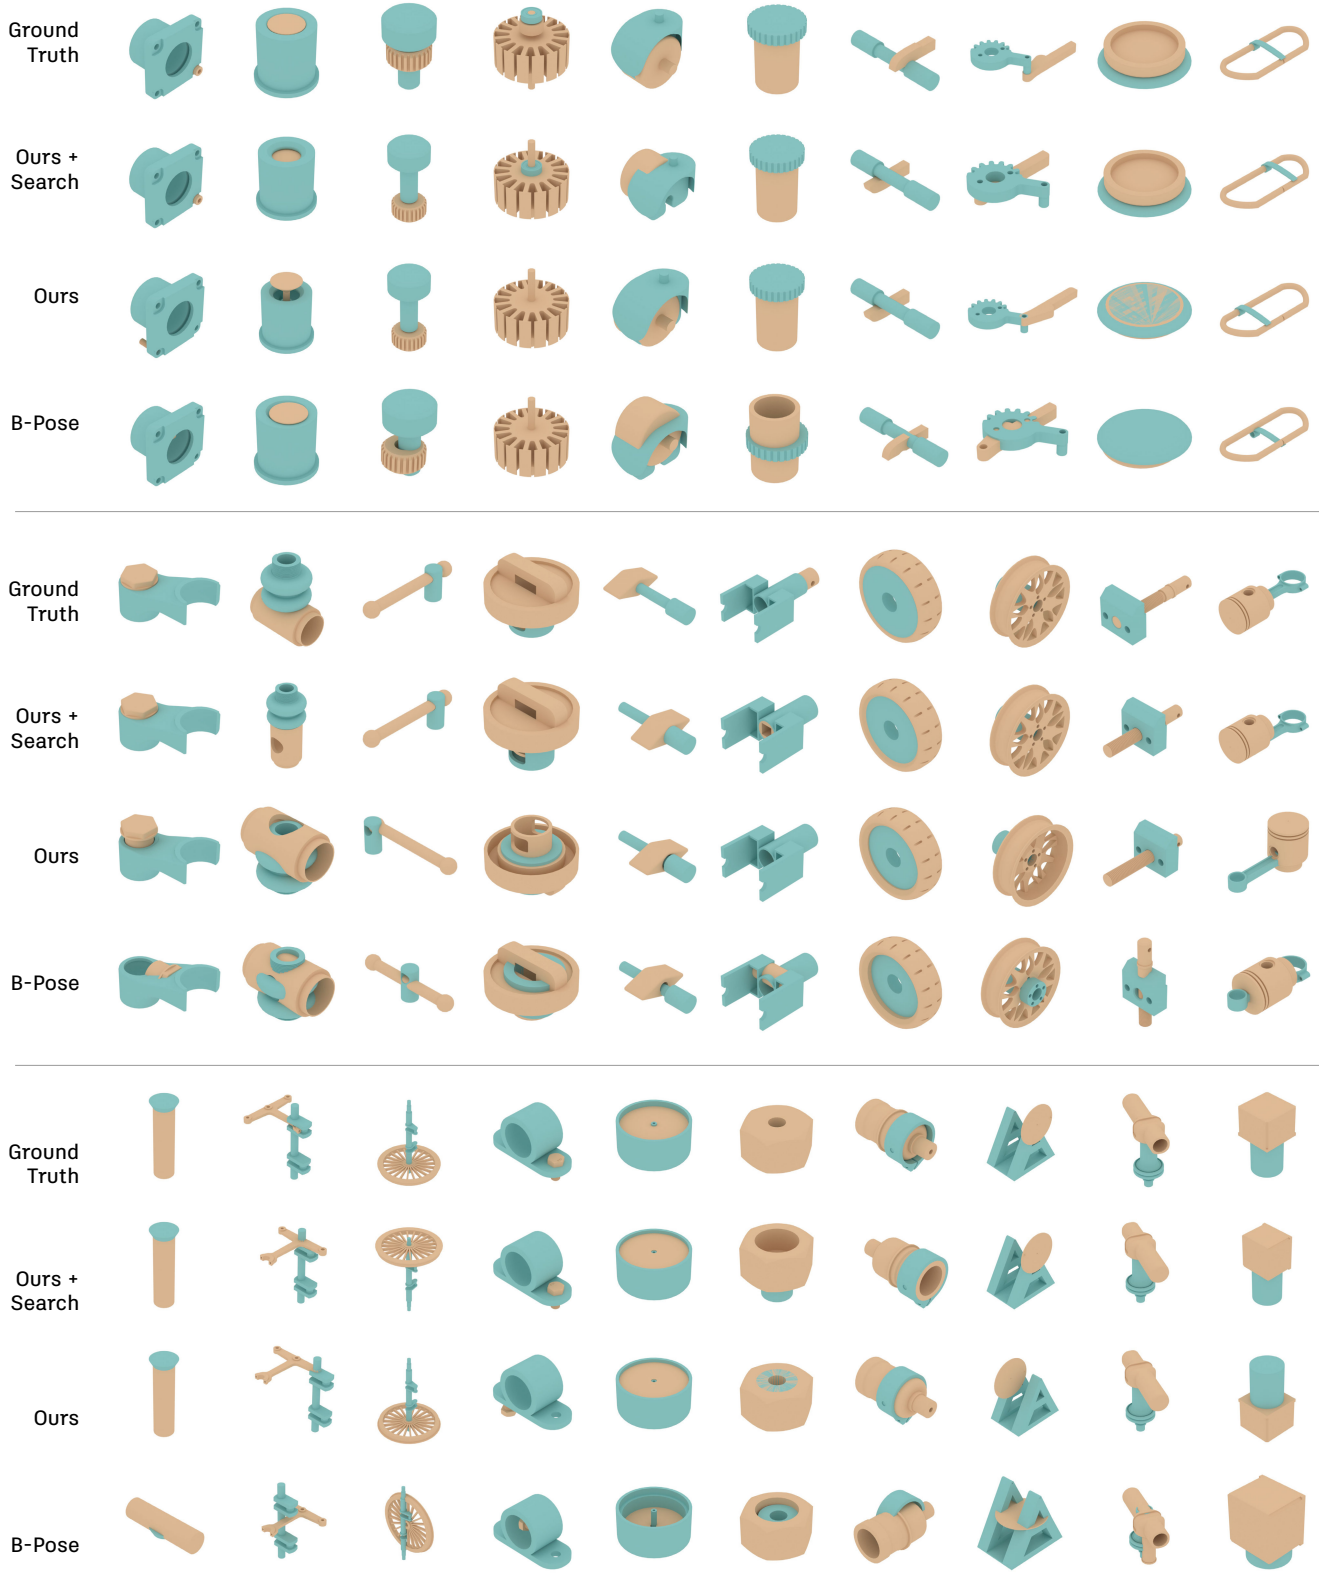

Figure 32. Additional qualitative joint pose prediction results comparing our method, with and without search, with the B-Pose baseline.

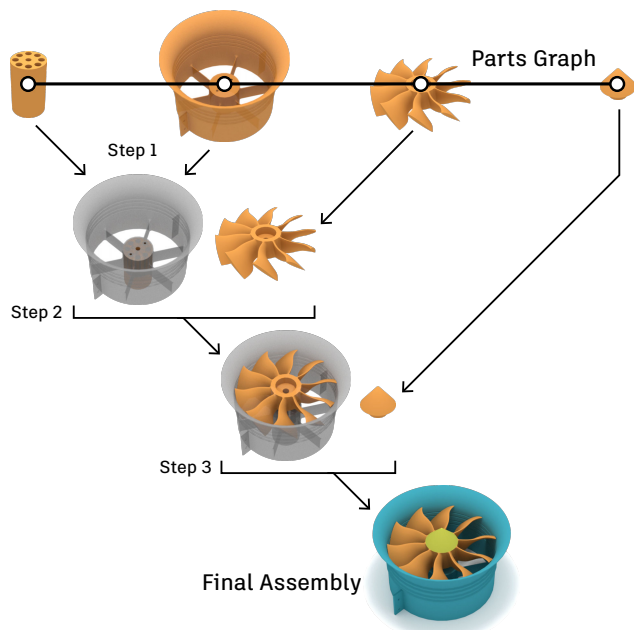

Figure 33. Example multi-part assembly sequence derived from a parts graph.

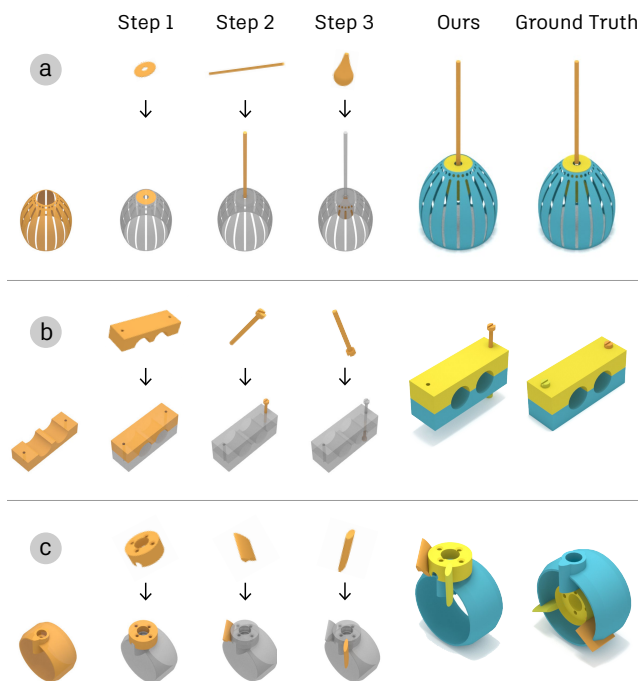

Figure 34. Additional examples of multi-part assembly.

less challenging for our approach compared to those with multiple axes. For example, Figure 34b shows a partial failure case where the main parts are correctly assembled but placement of the smaller parts is incorrect. Considering symmetry as an assembly criteria may help resolve such cases. We find that errors early on compound at each step

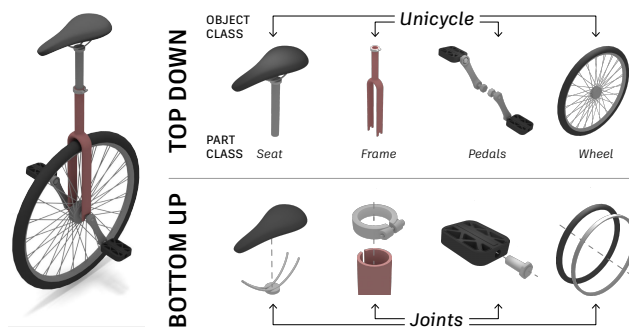

Figure 35. A future hybrid approach to assembly may look to combine *top down* knowledge and composition of objects and parts, with *bottom up* assembly using locally defined joints.

of the assembly, and reduce the overall chance of success. Figure 34c shows a failure case where an incorrect prediction at the first step impacts subsequent assembly steps and diverges significantly from the ground truth design. Finally, in all examples we assume that a well defined assembly sequence is provided as input, when in practice that may not be possible and an automated process would be desirable.

Ultimately we believe a hybrid approach, such as illustrated in Figure 35, will be effective to combine *top down* knowledge and composition of objects and parts, with the precision offered by *bottom up* assembly of locally defined joints. We leave this investigation to future work.

### A.3.2 Future Extensions

A limitation of our current network is that it does not leverage geometric or physics-based loss terms that may help with avoiding undesirable overlap between parts. A hybrid approach that combines points sampled from B-Rep entities [25] with a geometric loss term or uses physics simulations in a reinforcement learning environment, may improve upon our current results.

Another line of research is to experiment with conditioning the network to produce targeted output. For example, providing the current state of the assembly as conditioning may help resolve ambiguities when predicting where in an assembly a new part should be connected using a joint.

### A.4. Broader Impact

This work is motivated by the opportunity to encourage sustainable design through the reuse of existing physical components. Such components are often available in recycling streams, dead inventory, or existing supply chains. By enabling assembly aware design tools that can identify and automatically place suitable components, we hope to reduce the cost and negative environmental impact of establishing new tooling for manufacturing and the associated supply chains [20]. Intellectual property is a key consid-

eration with data driven approaches to design, as there exists the risk of unauthorized use or appropriation of existing designs. This risk is balanced by providing publicly available datasets, such as ours, and by component suppliers who freely provide CAD models to encourage the use and sale of their components.

## **A.5. Acknowledgments**

We would like to acknowledge the assistance of Eder Duran and Kamal Rahimi Malekshan for developing data extraction tools, Yewen Pu, Chin-Yi Cheng, Ye Wang, Leonardo Hernandez Cano, Ran Zhang, Jie Xu, and Tao Du for helpful early discussions, and Tonya Custis, Sachin Chitta, and Hui Li for reviewing early drafts of the paper.
